# Supplementary material for: Combining sandblasting and pink anodisation of Ti implants as a promising method for improving fibroblast adhesion and immune response
Source: Royal Society of Chemistry journal article supplement (doi:10.1039/d4tb00992d), 2024-01-01
Supplement: d4tb00992d1.pdf [file d4tb00992d1.pdf]

**Supplementary table 1.** Quantitative real-time PCR primer sequence for THP-1.

| <b>Gene symbol</b>             | <b>Sequence</b>                                     | <b>Accession number</b> |
|--------------------------------|-----------------------------------------------------|-------------------------|
| <b>TNF-<math>\alpha</math></b> | R: AGGCCCCAGTTTGAATTCTT<br>F: TCCTTCAGACACCCTCAAC   | AF043342                |
| <b>IL-10</b>                   | R: TCCCGTCAGTTGGTAGGTTC<br>F: ACAAGCCTACCCCTCCAGAT  | NM001382624             |
| <b>MCP-1</b>                   | R: AGATCTCCTTGGCCACAATG<br>F: CCCAGTCACCTGCTGTTAT   | NM002982                |
| <b>ICAM-1</b>                  | R: CTGACAAGTTGTGGGGGAGT<br>F: GGCTGGAGCTGTTTGAGAAC  | NM000201                |
| <b>NF-<math>\kappa</math>B</b> | R: CCTTCTGCTTGCAAATAGGC<br>F: CTGGAAGCACGAATGACAGA  | NM001382627             |
| <b>C5</b>                      | R: CTCCAGGCAATTGTTTTGGT<br>F: CTCCTCAGGCCATGTTTCATT | NM001735                |
