# Supplementary material for: Combining sandblasting and pink anodisation of Ti implants as a promising method for improving fibroblast adhesion and immune response
Source: Royal Society of Chemistry journal article supplement (doi:10.1039/d4tb00992d), 2024-01-01
Supplement: d4tb00992d2.pdf [file d4tb00992d2.pdf]

**Supplementary Table 2.** Results obtained by Perseus from the comparative analysis of serum proteins identified on PA and MC04 surfaces with respect to the combination of treatments MC04+PA. Differential proteins that showed a  $p \leq 0.05$  and a ratio greater than 1.5 were marked in yellow. Proteins that were more adsorbed on MC04+PA with respect to the individual treatments (MC04, PA) were marked in red. While those less adsorbed were marked in green.

| Uniprot code | Protein name                           | Unique peptides | MC04+PA/MC04 |       | MC04+PA/PA |       |
|--------------|----------------------------------------|-----------------|--------------|-------|------------|-------|
|              |                                        |                 | p value      | Ratio | p value    | Ratio |
| SPB12        | Serpin B12                             | 2               | 3.2E-03      | 8.10  | 8.7E-03    | 5.82  |
| FA10         | Coagulation factor X                   | 9               | 4.2E-02      | 5.88  | 8.3E-01    | 0.87  |
| DSC1         | Desmocollin-1                          | 6               | 8.5E-04      | 4.18  | 1.5E-01    | 2.45  |
| CO8B         | Complement component C8 beta chain     | 5               | 2.8E-02      | 3.12  | 8.2E-01    | 0.90  |
| FHR5         | Complement factor H-related protein 5  | 5               | 1.1E-02      | 2.96  | 1.7E-02    | 3.25  |
| SAMP         | Serum amyloid P-component              | 10              | 8.7E-05      | 2.78  | 1.7E-01    | 0.84  |
| TETN         | Tetranectin                            | 9               | 1.6E-03      | 2.48  | 2.0E-01    | 1.13  |
| C4BPB        | C4b-binding protein beta chain         | 5               | 3.9E-02      | 2.40  | 2.2E-01    | 0.81  |
| PCOC1        | Procollagen C-endopeptidase enhancer 1 | 5               | 9.1E-03      | 1.70  | 7.0E-02    | 1.36  |
| HRG          | Histidine-rich glycoprotein            | 15              | 8.4E-03      | 1.69  | 4.0E-01    | 1.12  |
| ANT3         | Antithrombin-III                       | 23              | 3.6E-02      | 0.65  | 3.1E-01    | 0.86  |
| KLKB1        | Plasma kallikrein                      | 16              | 2.8E-03      | 0.65  | 2.8E-01    | 0.89  |
| HV102        | Immunoglobulin heavy variable 1-2      | 1               | 1.1E-02      | 0.62  | 4.7E-02    | 0.23  |
| HV118        | Immunoglobulin heavy variable 1-18     | 1               | 1.6E-02      | 0.61  | 9.2E-01    | 0.99  |
| HV307        | Immunoglobulin heavy variable 3-7      | 2               | 8.7E-03      | 0.60  | 9.6E-03    | 0.69  |
| CO8A         | Complement component C8 alpha chain    | 8               | 1.4E-02      | 0.60  | 1.3E-01    | 0.74  |
| KV315        | Immunoglobulin kappa variable 3-15     | 1               | 3.7E-02      | 0.59  | 3.5E-01    | 0.82  |
| VTNC         | Vitronectin                            | 21              | 2.5E-03      | 0.57  | 4.6E-01    | 0.91  |
| PLF4         | Platelet factor 4                      | 2               | 9.6E-03      | 0.53  | 2.5E-02    | 0.59  |
| HV372        | Immunoglobulin heavy variable 3-72     | 2               | 6.4E-03      | 0.50  | 5.8E-03    | 0.55  |
| KV401        | Immunoglobulin kappa variable 4-1      | 4               | 5.9E-03      | 0.50  | 6.2E-04    | 0.71  |
| PROP         | Properdin                              | 5               | 2.6E-02      | 0.49  | 3.5E-02    | 0.56  |
| CBPB2        | Carboxypeptidase B2                    | 8               | 7.5E-03      | 0.49  | 1.3E-02    | 0.49  |
| APOE         | Apolipoprotein E                       | 27              | 1.8E-05      | 0.46  | 8.8E-01    | 0.99  |
| KNG1         | Kininogen-1                            | 26              | 2.2E-04      | 0.46  | 7.2E-01    | 0.96  |
| APOA         | Apolipoprotein A                       | 5               | 2.7E-02      | 0.43  | 2.8E-02    | 0.45  |
| HV459        | Immunoglobulin heavy variable 4-59     | 2               | 1.4E-02      | 0.42  | 6.1E-02    | 0.57  |
| FA11         | Coagulation factor XI                  | 31              | 5.5E-03      | 0.41  | 8.7E-01    | 1.04  |
| LV211        | Immunoglobulin lambda variable 2-11    | 1               | 2.9E-02      | 0.37  | 3.2E-01    | 0.57  |
| HV43D        | Immunoglobulin heavy variable 3-43D    | 1               | 2.9E-02      | 0.37  | 7.6E-02    | 0.47  |
| HV146        | Immunoglobulin heavy variable 1-46     | 1               | 3.5E-02      | 0.33  | 6.0E-02    | 0.40  |
| HABP2        | Hyaluronan-binding protein 2           | 16              | 4.6E-02      | 0.32  | 9.7E-04    | 0.51  |

|       |                                       |   |         |      |         |      |
|-------|---------------------------------------|---|---------|------|---------|------|
| SAA4  | Serum amyloid A-4 protein             | 4 | 2.9E-06 | 0.32 | 9.2E-01 | 1.01 |
| CRP   | C-reactive protein                    | 5 | 4.7E-02 | 0.31 | 2.1E-01 | 0.52 |
| KV108 | Immunoglobulin kappa variable 1-8     | 2 | 1.1E-04 | 0.10 | 1.4E-01 | 0.30 |
| APOC2 | Apolipoprotein C-II                   | 3 | 6.8E-02 | 1.29 | 2.6E-02 | 1.63 |
| C1QA  | Complement C1q subcomponent subunit A | 2 | 3.9E-01 | 1.22 | 4.4E-02 | 0.62 |
| CO2   | Complement C2                         | 4 | 7.0E-01 | 1.08 | 4.6E-04 | 0.60 |
| C1QC  | Complement C1q subcomponent subunit C | 5 | 2.8E-01 | 0.87 | 2.7E-04 | 0.53 |
| FA9   | Coagulation factor IX                 | 8 | 8.2E-01 | 0.89 | 2.9E-02 | 0.51 |
| APOA  | Apolipoprotein A                      | 5 | 2.8E-01 | 1.06 | 2.8E-02 | 0.45 |
| PF4V  | Platelet factor 4 variant             | 1 | 7.2E-01 | 0.89 | 2.0E-02 | 0.20 |
